# Supplementary material for: Integrated Analysis of Methylome and Transcriptome Changes Reveals the Underlying Regulatory Signatures Driving Curly Wool Transformation in Chinese Zhongwei Goats
Source: PubMed Central journal article supplement (PMC6960231; doi:10.3389/fgene.2019.01263), 2020-01-08
Supplement: Image_1.pdf [file Image_1.pdf]

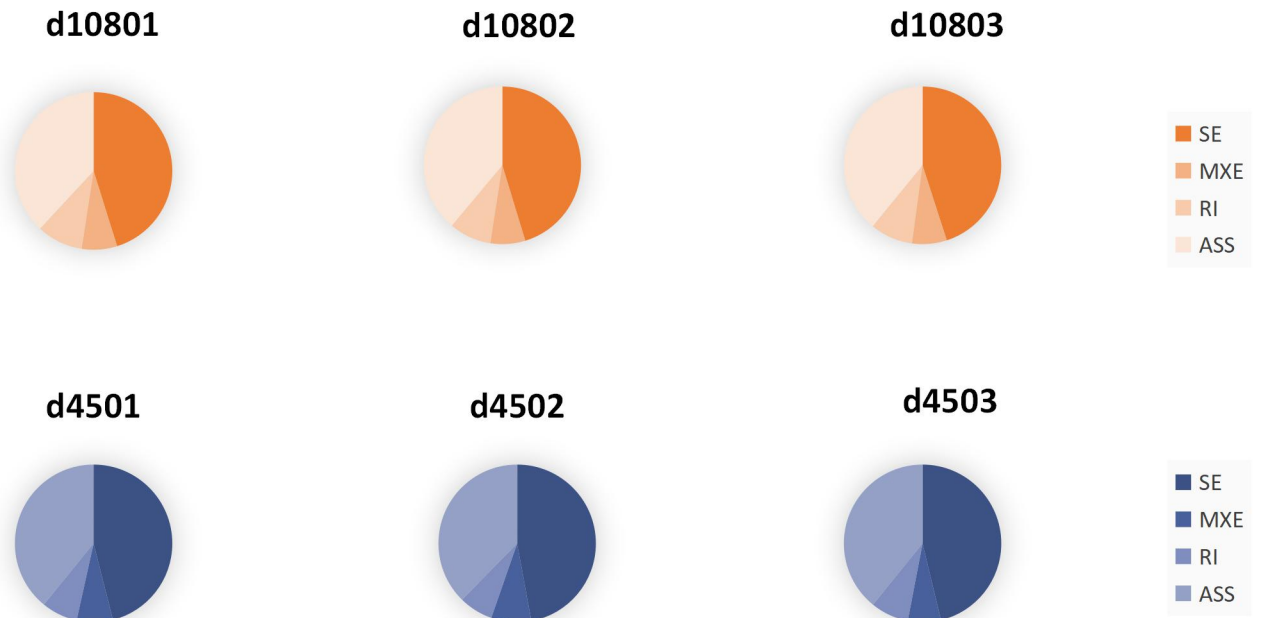

**Supplementary Figure 1.** Alternative splicing analysis. Pie diagram of forms of alternative splicing events in each sample individual. SE: skipped exon; RI: retained intron; MXE: mutually exclusive exons; ASS: alternative 5' or 3' splice site.
