# Supplementary material for: Integrated Analysis of Methylome and Transcriptome Changes Reveals the Underlying Regulatory Signatures Driving Curly Wool Transformation in Chinese Zhongwei Goats
Source: PubMed Central journal article supplement (PMC6960231; doi:10.3389/fgene.2019.01263), 2020-01-08
Supplement: Image_3.pdf [file Image_3.pdf]

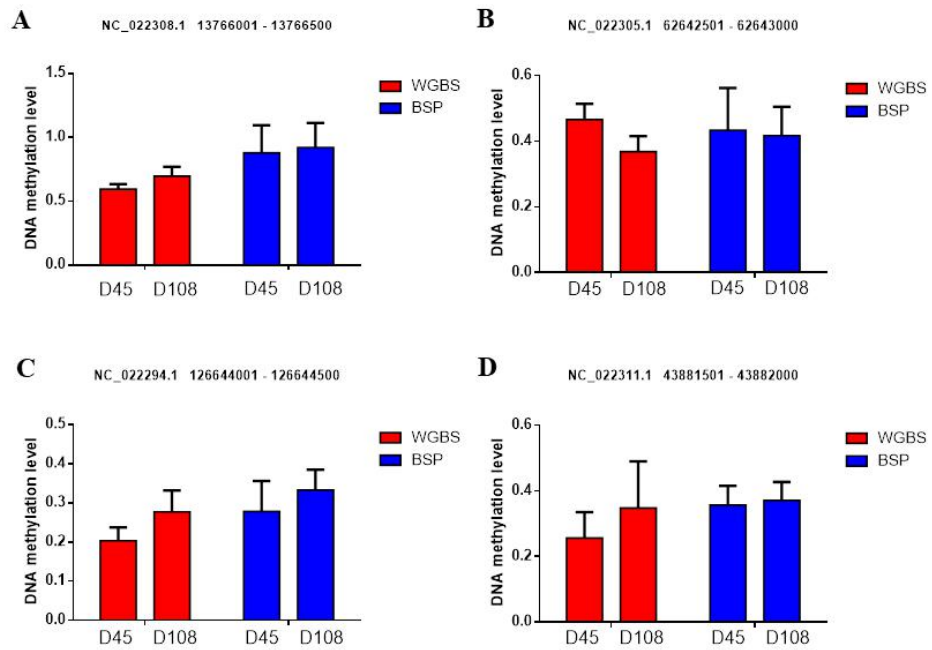

**Supplementary Figure 3.** DNA methylation level comparison of DMRs between whole genome bisulfite sequencing and bisulfite sequencing PCR.
