# Supplementary material for: Integrated Analysis of Methylome and Transcriptome Changes Reveals the Underlying Regulatory Signatures Driving Curly Wool Transformation in Chinese Zhongwei Goats
Source: PubMed Central journal article supplement (PMC6960231; doi:10.3389/fgene.2019.01263), 2020-01-08
Supplement: Image_4.pdf [file Image_4.pdf]

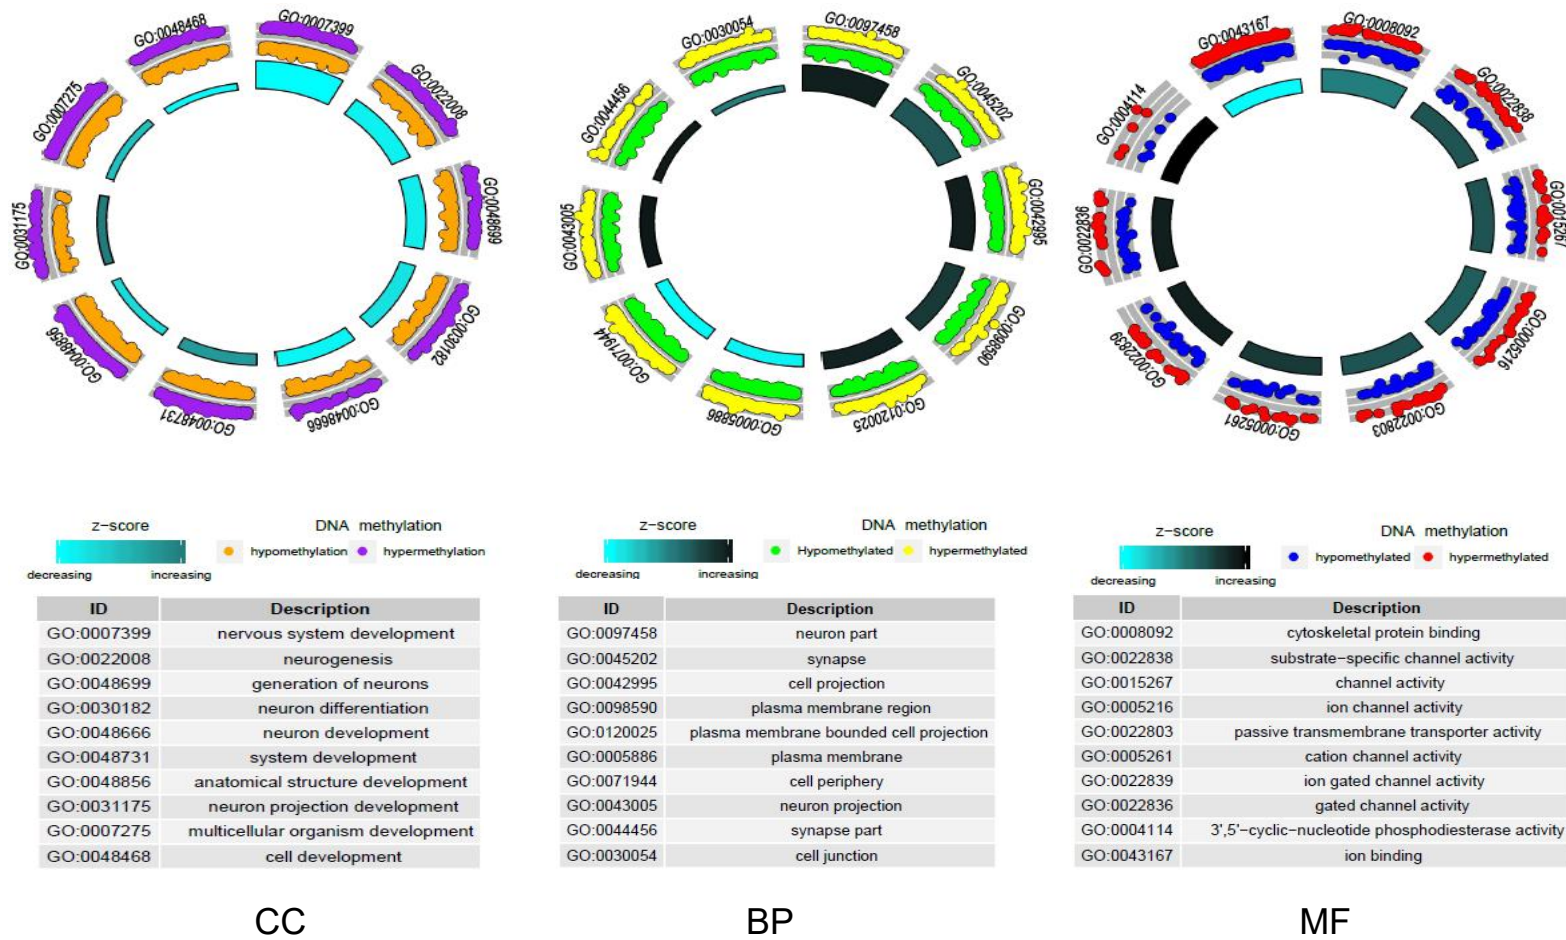

**Supplementary Figure 4.** GO terms enrichment analysis of DMGs. The z-score indicates the Difference value between counts of hypermethylated and hypomethylated genes in each GO term.
