# Supplementary material for: Integrated Analysis of Methylome and Transcriptome Changes Reveals the Underlying Regulatory Signatures Driving Curly Wool Transformation in Chinese Zhongwei Goats
Source: Front Genet. 2020 Jan 8;10:1263. doi: 10.3389/fgene.2019.01263 (PMC6960231; doi:10.3389/fgene.2019.01263)
Supplement: Supplementary file 7 [file Table_3.xlsx]

## Sheet: Sheet1
Table S3. List of primers used in bisulfite sequencing
Primer	Sequence	Region	Amplicon (+strand, CHIR 1.0)
1-F	GGYGGAGTTTGGTGGATTGT	intergenic (BRINP3; LOC102172647)	NC_022308.1: 13765994-13766315
1-R	CAAAAACCACAACTTTAATCCCT
2-F	AAGTTGGAGGATAGTATGTGGT	exonic (LOC102172278)	NC_022305.1: 62642420-62643021
2-R	CACCTCACRTCTATCCTACTCT
3-F	TAYGGTTATTAAGGATTGTTGGA	intergenic (MAN1C1;LDLRAP1)	NC_022294.1: 126644099-126644443
3-R	TCTCAACAACTCAACACAACACC
4-F	TAYGAGATAATGGGATTTTAGTGGT	upstream (NMT1)	NC_022311.1: 1 43881511-43882001
4-R	ACCCACTAAAAACCCAAATACA
Y represents C or T bases
